# Supplementary material
Source: PubMed Central journal article supplement (PMC5659128)

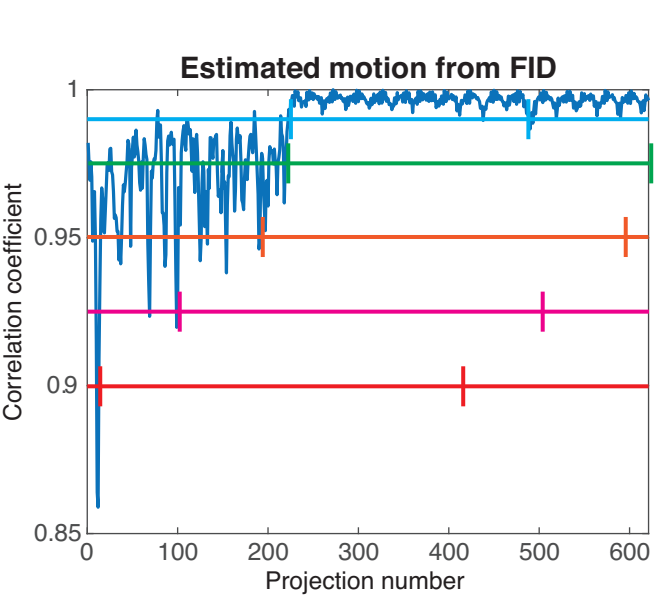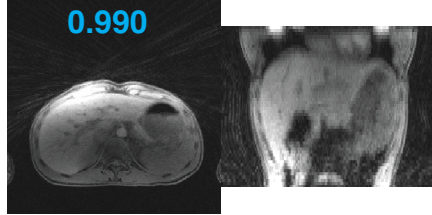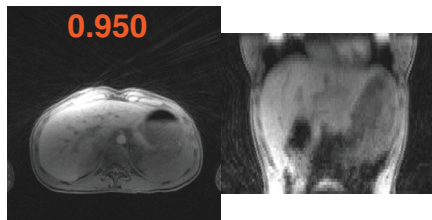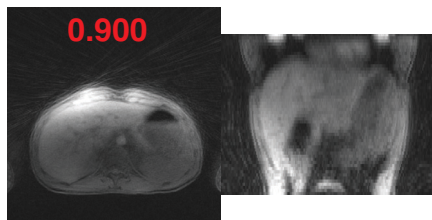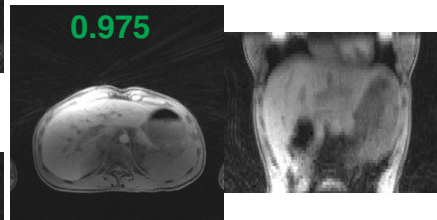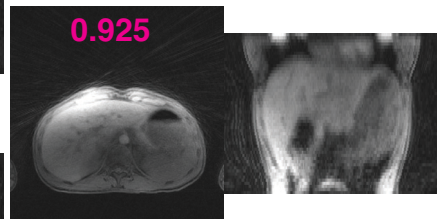

Supplement: NBM-30-na-s001.pdf [file NBM-30-na-s001.pdf]
